# Supplementary material for: Noninvasive Prediction of Elevated Wedge Pressure in Pulmonary Hypertension Patients Without Clear Signs of Left‐Sided Heart Disease: External Validation of the OPTICS Risk Score
Source: PubMed Central journal article supplement — J Am Heart Assoc. 2020 Jul 31;9(15):e015992. doi: 10.1161/JAHA.119.015992 (PMC7792270; doi:10.1161/jaha.119.015992), 2020-07-31

# **Supplemental Material**

**Table S1. Odds ratios for post-capillary PH from univariate logistic regression.**

|                            | OR (95% CI)       | P-value |
|----------------------------|-------------------|---------|
| Males                      | 0.69 [ 0.38-1.28] | 0.242   |
| Age ≥ 59 years             | 4.13 [2.34-7.27]  | < 0.001 |
| BMI ≥ 30 kg/m <sup>2</sup> | 5.38 [ 3.11-9.31] | <0.001  |
| <b>Medical history of</b>  |                   |         |
| Diabetes                   | 7.61 [4.39-13.21] | <0.001  |
| Atrial fibrillation, any   | 7.27 [3.98-13.27] | <0.001  |
| Hypertension               | 5.00 [2.94-8.53]  | <0.001  |
| Dyslipidaemia              | 3.42 [1.86-6.26]  | <0.001  |
| Smoking > 1 pack year      | 1.15 [0.69-1.92]  | 0.594   |
| Valvular surgery           | 21.1 [6.78-65.95] | <0.001  |
| Coronary artery disease    | 4.83 [2.49-9.35]  | <0.001  |
| Left heart disease         | 7.01 [3.79-12.95] | <0.001  |
| <b>ECG</b>                 |                   |         |
| Left atrial dilatation     | 0.49 [0.18-1.27]  | 0.141   |
| SV1+RV6 per mm             | 1.08 [1.04-1.12]  | <0.001  |
| <b>Echocardiography</b>    |                   |         |
| Left atrial dilation       | 9.19 [5.16-16.39] | <0.001  |

BMI: body mass index, SV1+ RV6: sum of S wave in V1 and R wave in V6 on ECG (in mm),  
Atrial fibrillation, any: paroxysmal or permanent atrial fibrillation

**Table S2. Sensitivity, specificity, positive predictive value, negative predictive value and accuracy at various cut-off points using the OPTICS risk scoring system.**

| Risk score   | Sensitivity | Specificity | PPV        | NPV       | Accuracy  | Probability |
|--------------|-------------|-------------|------------|-----------|-----------|-------------|
| ≥ 0          | 100         | 0           | 17         | Na        | 17        | 0.00        |
| ≥ 13         | 100         | 37          | 25         | 100       | 48        | 0.01        |
| ≥ 26         | 97          | 51          | 28         | 99        | 58        | 0.03        |
| ≥ 39         | 92          | 71          | 39         | 98        | 74        | 0.07        |
| ≥ 52         | 89          | 82          | 50         | 97        | 83        | 0.15        |
| ≥ 65         | 75          | 93          | 70         | 95        | 90        | 0.31        |
| ≥ 78         | 58          | 97          | 79         | 92        | 90        | 0.53        |
| ≥ 91         | 38          | 98          | 83         | 89        | 88        | 0.74        |
| <b>≥ 104</b> | <b>23</b>   | <b>100</b>  | <b>100</b> | <b>86</b> | <b>87</b> | <b>0.88</b> |
| ≥ 117        | 16          | 100         | 100        | 86        | 86        | 0.95        |
| ≥ 130        | 9           | 100         | 100        | 84        | 85        | 0.98        |
| ≥ 143        | 6           | 100         | 100        | 84        | 84        | 0.99        |

Data are presented as %. NA: not applicable. PPV: positive predictive value, NPV: negative predictive value

**Figure S1. Flow chart representing patients' numbers and study methods of the development cohort.**

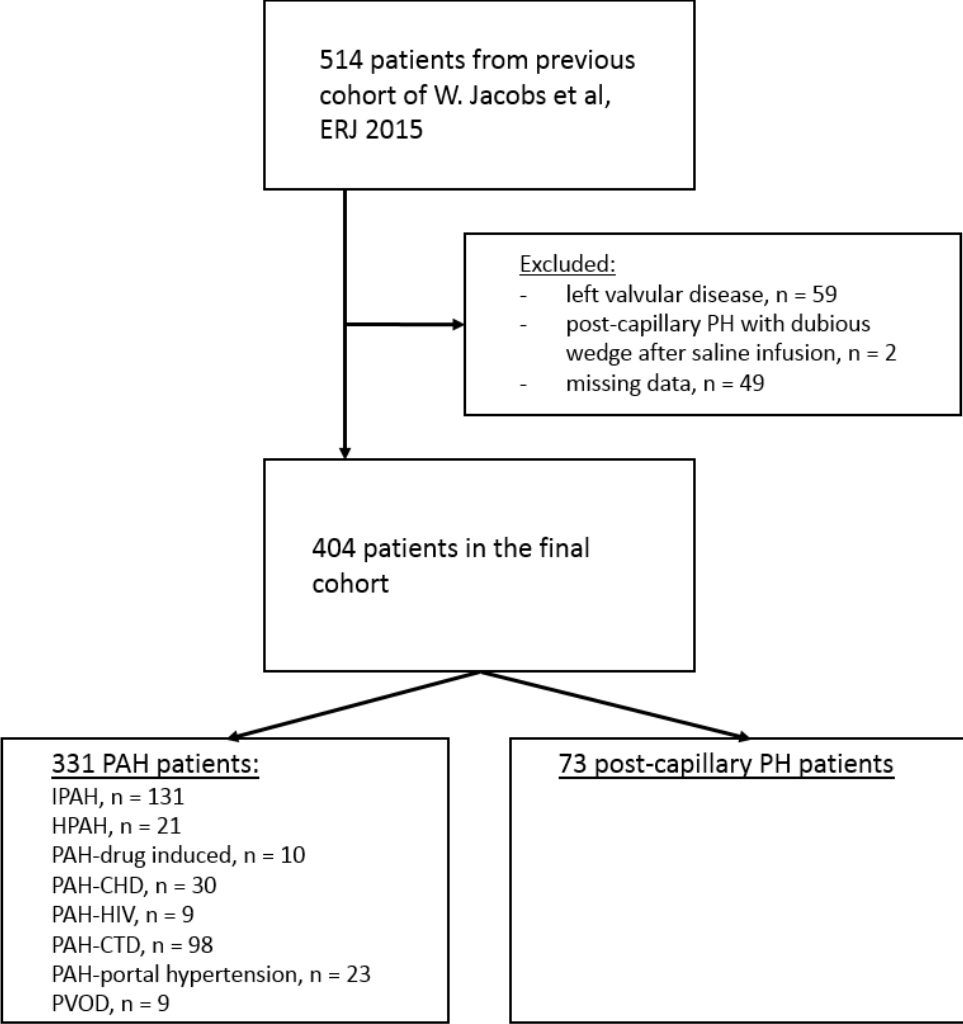

PH: Pulmonary Hypertension, PAH: Pulmonary Arterial Hypertension, IPAH: idiopathic pulmonary arterial hypertension, HPAH: hereditary pulmonary arterial hypertension, PAH-CHD: PAH due to congenital heart disease, PAH-CTD: PAH due to connective tissue disease, PVOD: pulmonary veno-occlusive disease, PCWP: wedge pressure, LVEDP: left ventricular end diastolic pressure

**Figure S2. Receiver operator characteristic curve of the multivariate risk model for prediction of post-capillary PH in a population at risk for pre-capillary PH.**

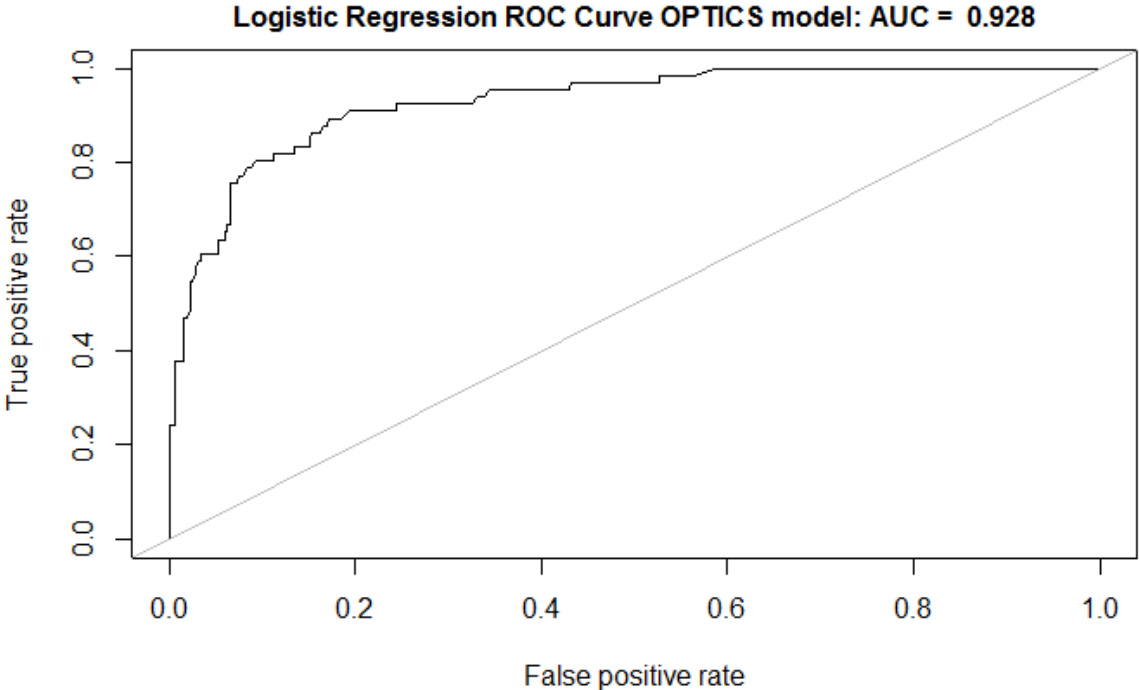

**Figure S3. Pyramid graph from the development cohort of patients with post-capillary PH and pre-capillary-PH, divided according to the OPTICS risk score outcomes of individual patients.**

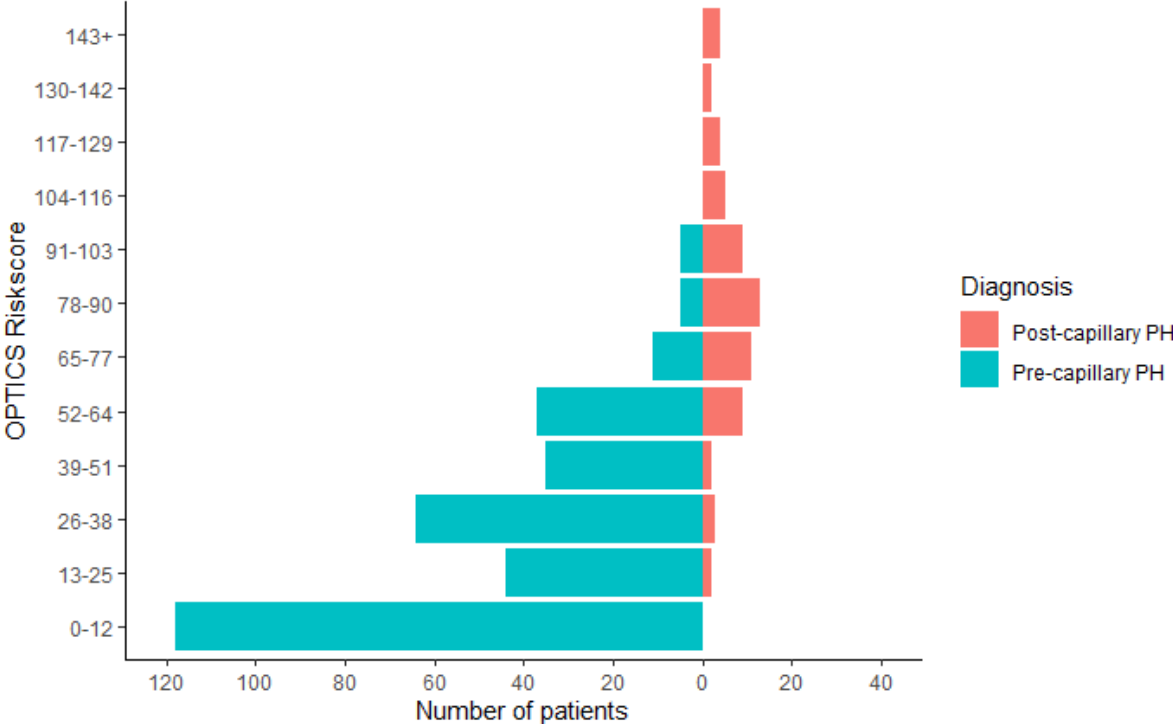

Supplement: JAH3-9-e015992-s001.pdf [file JAH3-9-e015992-s001.pdf]
